# Supplementary material for: Effectiveness and Safety of First-Line Pembrolizumab in Older Adults with PD-L1 Positive Non-Small Cell Lung Cancer: A Retrospective Cohort Study of the Alberta Immunotherapy Database
Source: MDPI journal article supplement (doi:10.3390/curroncol28050357), 2021-10-18
Supplement: s1 [file s1]

## Supplementary Materials

**Table S1.** Sensitivity analysis summary data of relevant clinical outcomes based on age (cut-off 75 years-old).

| Clinical Outcome                      | Overall            | Age                   |                      | <i>p</i> -Value |
|---------------------------------------|--------------------|-----------------------|----------------------|-----------------|
|                                       |                    | <75 ( <i>n</i> = 248) | ≥75 ( <i>n</i> = 79) |                 |
| <b>ORR – no. (%)</b>                  | 79 (32.0)          | 58 (31.4)             | 21 (33.9)            | 0.71            |
| <b>mTTF – mo. (95% CI)</b>            | 3.91 (3.06–4.86)   | 3.58 (2.76–4.80)      | 5.52 (2.76–7.16)     | 0.90            |
| <b>mOS – mo. (95% CI)</b>             | 11.24 (8.77–15.31) | 11.3 (7.79–16.2)      | 10.5 (8.28–20.8)     | 0.99            |
| <b>Landmark Analyses – no. (%)</b>    |                    |                       |                      |                 |
| 3 mo                                  | 244 (74.6)         | 179 (72.2)            | 65 (82.3)            | 0.07            |
| 12 mo                                 | 135 (41.3)         | 103 (41.5)            | 32 (40.5)            | 0.87            |
| 24 mo                                 | 41 (12.5)          | 34 (32.7)             | 7 (8.9)              | 0.26            |
| <b>Subsequent Treatment – no. (%)</b> | 61 (18.7)          | 53 (21.4)             | 8 (10.3)             | 0.03            |

**Table S2.** Sensitivity analysis summary data of safety outcomes based on age (cut-off 75 years-old).

| Safety Outcomes                | Age                   |                      | <i>p</i> -Value |
|--------------------------------|-----------------------|----------------------|-----------------|
|                                | <70 ( <i>n</i> = 248) | ≥70 ( <i>n</i> = 79) |                 |
| Any Significant IrAE – no. (%) | 60 (24.2)             | 27 (34.2%)           | 0.08            |
| Significant IrAE – no. (%)     |                       |                      | 0.37            |
| Pneumonitis                    | 19 (31.7)             | 9 (33.3%)            |                 |
| Colitis                        | 10 (16.7)             | 3 (11.1%)            |                 |
| Arthritis                      | 9 (15.0)              | 3 (11.1%)            |                 |
| Dermatologic                   | 7 (11.7%)             | 2 (7.4%)             |                 |
| Hepatitis                      | 2 (3.3%)              | 2 (7.4%)             |                 |
| Thyroiditis                    | 1 (1.7%)              | 2 (7.4%)             |                 |
| Adrenal insufficiency          | 0 (0.0%)              | 2 (7.4%)             |                 |
| Other                          | 12 (20.0%)            | 4 (14.8%)            |                 |
| irAE Hospitalization – no. (%) | 19 (31.7%)            | 5 (19.2%)            | 0.24            |
| Any Hospitalization – no. (%)  | 109 (44.0%)           | 41 (51.9%)           | 0.22            |

**Table S3.** Univariate analysis of clinical and laboratory factors associated with OS.

| <b>Characteristic</b>          | <b>OS HR (95% CI)</b> | <b><i>p</i>-Value</b> |
|--------------------------------|-----------------------|-----------------------|
| <b>Age</b>                     |                       |                       |
| <70 (reference) vs. ≥70        | 0.98 (0.74–1.30)      | 0.91                  |
| <b>Autoimmune Disease</b>      |                       |                       |
| No (reference) vs. Yes         | 1.00 (0.72–1.40)      | 0.98                  |
| <b>ECOG</b>                    |                       |                       |
| <2 (reference) vs. ≥2          | 2.85 (2.11–3.83)      | <0.001                |
| <b>Brain Metastases</b>        |                       |                       |
| No (reference) vs. Yes         | 1.09 (0.72–1.64)      | 0.69                  |
| <b>Liver Metastases</b>        |                       |                       |
| No (reference) vs. Yes         | 1.61 (1.14–2.28)      | 0.008                 |
| <b>BMI</b>                     |                       |                       |
| <30 (reference) vs. ≥30        | 1.69 (1.16–2.47)      | 0.006                 |
| <b>PLR</b>                     |                       |                       |
| <180 (reference) vs. ≥180      | 1.49 (1.05–2.13)      | 0.03                  |
| <b>LIPI</b>                    |                       |                       |
| Good (reference) vs. Int./Poor | 2.53 (1.80–3.55)      | <0.001                |
| <b>Albumin</b>                 |                       |                       |
| ≥33 (reference) vs. <33        | 1.90 (1.36–2.64)      | <0.001                |
| <b>Hemoglobin</b>              |                       |                       |
| ≥130 (reference) vs. <130      | 1.84 (1.35–2.49)      | <0.001                |
